# Supplementary material
Source: PubMed Central journal article supplement (PMC6368397)

## SUPPLEMENTAL MATERIAL

### PROMISE Trial Organization

#### Executive Committee

Pamela S. Douglas, MD, Duke Clinical Research Institute, Durham, NC  
Lawton Cooper, MD, National Heart, Lung, and Blood Institute, Bethesda, MD  
Udo Hoffmann, MD, MPH, Massachusetts General Hospital, Boston, MA  
Kerry Lee, PhD, Duke Clinical Research Institute, Durham, NC  
Daniel Mark, MD, MPH, Duke Clinical Research Institute, Durham, NC

#### Data and Safety Monitoring Board

Robert Bonow, MD, Northwestern University Feinberg School of Medicine, Chicago, IL  
Garnet Anderson, PhD, Fred Hutchinson Cancer Research Center, Seattle, WA  
Alain Bertoni, MD, MPH, Wake Forest University School of Medicine, Winston-Salem, NC  
J. Jeffrey Carr, MD, Wake Forest University School of Medicine, Winston-Salem, NC  
James K. Min, MD, New York-Presbyterian Hospital/Weill-Cornell Medical Center, New York, NY  
Michael Proschan, PhD, National Institutes of Health, Bethesda, MD  
John A. Spertus, MD, MPH, Washington University School of Medicine, St. Louis, MO  
Connie M. Ulrich, PhD, RN, University of Pennsylvania School of Nursing, Philadelphia, PA

#### Operations Steering Committee (in addition to Executive Committee)

Hussein R. Al-Khalidi, PhD, Duke Clinical Research Institute, Durham, NC  
Denise Bonds, MD, MPH, National Heart, Lung, and Blood Institute, Bethesda, MD  
Nakela Cook, MD, National Heart, Lung, and Blood Institute, Bethesda, MD  
Rowena J. Dolor, MD, MHS, Duke Clinical Research Institute, Durham, NC  
Alan Go, MD, Kaiser Permanente Division of Research, Oakland, CA  
Christopher Fordyce, MD, Duke Clinical Research Institute, Durham, NC  
Tina Harding, RN, BSN, Duke Clinical Research Institute, Durham, NC  
Sarah Hayden, Duke Clinical Research Institute, Durham, NC  
Andrzej Kosinski, PhD, Duke Clinical Research Institute, Durham, NC  
Mitchell W. Krucoff, MD, Duke Clinical Research Institute, Durham, NC  
Eric Leifer, PhD, National Heart, Lung, and Blood Institute, Bethesda, MD  
Beth Martinez, Duke Clinical Research Institute, Durham, NC  
Daniel W. Mudrick, MD, MPH, Duke Clinical Research Institute, Durham, NC  
Manesh R. Patel, MD, Duke Clinical Research Institute, Durham, NC  
Michael H. Picard, MD, Massachusetts General Hospital, Boston, MA  
Geoffrey Rubin, MD, Duke University School of Medicine, Durham, NC  
Kristen Salvaggio, Massachusetts General Hospital, Boston, MA  
Ricky M. Schneider, MD, Holy Cross Hospital, Fort Lauderdale, FL  
Alexandra Shen, MD, Duke Clinical Research Institute, Durham, NC  
Jean Claude Tardif, MD, Montréal Heart Institute, Montreal, Canada  
Wanda Tate, Duke Clinical Research Institute, Durham, NC  
James E. Udelson, MD, Tufts University School of Medicine, Boston, MA  
John Vavalle, MD, Duke Clinical Research Institute, Durham, NC  
Eric J. Velazquez, MD, Duke Clinical Research Institute, Durham, NC

#### Statistical and Data Coordinating Center

Kerry Lee, PhD, Duke Clinical Research Institute, Durham, NC  
Hussein R. Al-Khalidi, PhD, Duke Clinical Research Institute, Durham, NC

Andrzej Kosinski, PhD, Duke Clinical Research Institute, Durham, NC  
Jyotsna Garg  
Megan Huang, PhD  
Stephanie Wu  
Qinghong Yang  
Eric Yow, MS  
Aijing (Zoe) Zhang

**Diagnostic Testing Coordinating Center**

Udo Hoffmann, MD, MPH, Massachusetts General Hospital, Boston, MA  
Charles Apgar, MBA, American College of Radiology, Philadelphia, PA  
Kristen Salvaggio, Massachusetts General Hospital, Boston, MA  
James E. Udelson, MD, Tufts University School of Medicine, Boston, MA

**Core Laboratories**

CTA: Udo Hoffmann, MD, MPH (PI), Massachusetts General Hospital, Boston, MA  
Stephan Achenbach, MD (overreads), University of Erlangen, Germany  
Erin Corsini, Massachusetts General Hospital, Boston, MA  
Brian B. Ghoshhajra, MD, MBA (sites, radiation), Massachusetts General Hospital, Boston, MA  
Michael Lu, MD, Massachusetts General Hospital, Boston, MA  
Quynh Truong, MD, MPH (online reader certification), Massachusetts General Hospital, Boston, MA

Nuclear imaging: James E. Udelson, MD, Tufts University School of Medicine, Boston, MA  
Debra Kinan, RT(N), Tufts University School of Medicine, Boston, MA

Stress echocardiography: Michael H. Picard, MD, Massachusetts General Hospital, Boston, MA

Stress ECG: Mitchell W. Krucoff, MD, Duke Clinical Research Institute, Durham, NC  
Coronary angiography: Manesh Patel, MD, Duke Clinical Research Institute, Durham, NC

## **Enrolling Investigators and Sites**

### **UNITED STATES**

#### **Alabama**

Edward Carlos, Sunbelt Research Group LLC; Jason Cole, Cardiology Associates; Michael Johnson, North Huntsville Family Care PC; Mathew Krista, PrimeCare; Michael Ridner, The Heart Center PC

#### **Arizona**

Aiden Abidov, University Medical Center; Barbara Barker, Advanced Cardiac Specialists; Roger Bies, Mercy Gilbert Medical Center

#### **Arkansas**

David Jones, Arkansas Cardiology PA; Larry Weathers, Mercy Heart and Vascular Center

#### **California**

Timothy Albert, Salinas Valley Memorial Hospital; Kevin Ariani, Northridge Hospital Medical Center; Supratim Banerjee, Comprehensive Cardiovascular Medical Group; Matthew Budoff, Los Angeles Biomedical Research Institute; Donald Chang, V.A. Greater Los Angeles Healthcare System; Steven Forman, Los Alamitos Cardiovascular; Gary Foster, V.A. Loma Linda Healthcare System; Joe Hsu, Kaiser Permanente Medical Center; James Jang, Kaiser Permanente; Andrew Kahn, University of California San Diego Medical Center; Ronald Karlsberg, Cardiovascular Research Foundation of Southern California; Mayil Krishnam, University of California Irvine Medical Center; Margaret Lee, Olive View - UCLA Medical Center; Norman Lopor, Westside Medical Associates of Los Angeles; Irving Loh, Westlake Medical Research; Mark Lurie, Torrance Memorial Medical Center; Michael McConnell, Stanford University Medical Center; Stefan Ruehm, Ronald Reagan UCLA Medical Center; Gabriel Vorobiof, Long Beach Memorial Hospital

#### **Colorado**

Simeon Abramson, Porter Adventist Hospital; Steven Friedrich, South Denver Cardiology Associates PC; Jamaluddin Moloo, University of Colorado Hospital; Stephen Treat, Medical Center of the Rockies

#### **Connecticut**

Andrew Keller, Danbury Hospital; Clifford Yang, University of Connecticut Health Center

#### **Florida**

Dean Bramlet, Dean Bramlet MD PA; Edward Braun, Midtown Medical Center; Jean Foucauld, Cardiology Partners Research Institute; Akash Ghai, Tallahassee Research Institute; Pablo Guzman, Cardiology Associates of Fort Lauderdale; Robert Hendel, University of Miami Hospital; Julian Javier, Pharma Research International Inc.; Carsten Schmalfuss, Malcom Randall V.A. Medical Center; Ricky Schneider, Holy Cross Medical Group; Carlos Sotolongo, Baptist Heart Specialists; Alan Tannenbaum, Primary Care Associates; Barry Weinstock, Orlando Regional Medical Center

#### **Georgia**

Kimberly Champney, Northside Hospital; Stephen Frohwein, Saint Josephs Hospital of Atlanta; Lonnie Jenkins, Synergy Therapeutic Partners; Devendra Koganti, Southern Heart Research Institute LLC; Sheldon Litwin, Georgia Regents University; Patricia Shapiro, South Coast Medical Group

**Hawaii**

Cyril Leung, Kaiser Permanente Moanalua Medical Center

**Idaho**

David Hinchman, Saint Lukes Boise Medical Center

**Illinois**

Stanley Clark, Midwest Heart Foundation; Sorin Danciu, Advocate Medical Group - Heart and Vascular of Illinois; Jerome Hines, Illinois Heart and Vascular Foundation; Amit Patel, University of Chicago Medical Center; Daniel Sullivan, Midwest Heart Foundation; Dinker Trivedi, Advocate Christ Medical Center; Mladen Vidovich, University of Illinois at Chicago

**Indiana**

Jo Mahenthiran, Indiana Heart Hospital; Saeed Shaikh, Indiana Heart Physicians Inc.; Shawn Teague, Indiana University Health

**Iowa**

Craig Clark, Radiology Consultants of Iowa; Enrico Martin, Iowa Heart Center; Gardar Sigurdsson, University of Iowa Hospitals and Clinics

**Kansas**

Steve Bloom, Midwest Cardiology Associates; Michael Hagley, Promise Regional Medical Center

**Kentucky**

William Schmidt II, Norton Cardiovascular Associates; Vincent Sorrell, University of Kentucky Hospital

**Louisiana**

Michael Turner, Cardiovascular Specialist of Southwest Louisiana

**Maine**

Robert Weiss, Maine Research Associates

**Maryland**

Steven Hearne, Delmarva Heart LLC; Scott Jerome, University of Maryland Cardiology Physicians

**Massachusetts**

Alexander Morss, South Shore Hospital; Rick Ruberg, Boston Medical Center; Quynh Truong, Massachusetts General Hospital

**Michigan**

Khaled Abdul-Nour, Henry Ford Health System; Kavitha Chinnaiyan, William Beaumont Hospital; Tauqir Goraya, Michigan Heart PC; John Heath, William Beaumont Hospital - Troy; Mark Meengs, Mercy Health Muskegon; George Nahhas, Oakwood Hospital and Medical Center - Dearborn; Majed Nounou, Cardiology Consultants of East Michigan; Souheil Saba, Saint John Providence Park Hospital; Susan Sallach, Michigan Cardiovascular Institute

**Minnesota**

Wilson Ginete, Essentia Health Saint Marys Medical Center; Gregory Helmer, University of Minnesota Heart Care; Mary McLaurin, North Memorial Medical Center; Patricia Pellikka, Mayo Clinic; Jamie Pelzel, CentraCare Heart and Vascular Center at Saint Cloud Hospital

**Mississippi**

William Carroll, Cardiology Associates of North Mississippi; Arthur Martin, Hattiesburg Clinic; Andrew Rivard, University of Mississippi Medical Center

**Missouri**

Jeffrey Ciaramita, Saint Johns Mercy Heart Hospital; Zafir Hawa, North Kansas City Hospital; Pamela Woodard, Barnes Jewish Hospital

**Montana**

Alexander Jehle, Saint Patrick Hospital and Health Sciences Center

**Nebraska**

Michael Delcore, The Cardiac Center of Creighton University; Thomas Porter, University of Nebraska Medical Center; Eric Van De Graaff, Alegent Midlands Community Hospital

**New Jersey**

Navin Budhwani, The Valley Hospital; Renee Bullock-Palmer, Deborah Heart and Lung Center; Andrey Espinoza, Hunterdon Medical Center; John Kostis, University of Medicine and Dentistry of New Jersey/Robert Wood Johnson Medical School; Muhammad Mustafa, Capital Cardiology Associates

**New Mexico**

Brendan Cavanaugh, New Mexico Heart Institute PA

**New York**

Randy Cohen, Saint Lukes Roosevelt Hospital Center; Robert Donnino, V.A. New York Harbor Healthcare System - Manhattan Campus; Mario Garcia, Montefiore Medical Center; Dennis Goodman, New York Medical Associates; John Heitner, New York Methodist Hospital; Mazullah Kamran, Elmhurst Hospital; Ellis Lader, MidValley Cardiology; Michael Marmulstein, Albany Associates in Cardiology; Dhananjai Menzies, Bassett Medical Center; Robert Morris, Capital Cardiology Associates; Brian Page, University at Buffalo; Chong Park, New York Hospital of Queens; Michael Poon, Stony Brook University Medical Center; Michael Wilson, Millard Fillmore Suburban Hospital

**North Carolina**

Mahmoud Atieh, Sanford Cardiology; David Bohle, Forsyth Medical Center; Rowena Dolor, Primary Care Research Consortium at Duke Clinical Research Institute; Michael Dulin, Carolinas Medical Center Eastland Family Practice; Christian Gring, Wake Heart and Vascular Associates; Joseph Hakas, Pinehurst Medical Clinic Inc.; Dalton McLean, Lebauer Cardiovascular Research Foundation; Mark Rorie, Asheville Cardiology Associates; Kevin Sharkey, Novant Health Heart and Vascular Institute

**North Dakota**

Yassar Almanaseer, Essentia Health

## **Ohio**

William Dirkes, Sentral Clinical Research Services; Jonathan Goldberg, Louis Stokes Cleveland VA Medical Center; Mark Iler, Summa Health System; Karen Kutoloski, Metro Health System; Mohammed Maaieh, Northwest Ohio Cardiology Consultants; John Mashny, Bethesda North Hospital; Robert Pelberg, Lindner Clinical Trial Center; David Richards, Riverside Methodist Hospital; Jodi Tinkel, The University of Toledo

## **Oklahoma**

George Chrysant, Integris Baptist Medical Center; Roger Des Prez, Oklahoma Heart Institute; Gregory Hill, Warren Cancer Research Foundation/Saint Francis Hospital; Iftikhar Hussain, Vital Prospects Clinical Research Institute PC

## **Oregon**

Michael Shapiro, Oregon Health and Science University

## **Pennsylvania**

Christopher Allen, Donahue Cardiology Associates; Zaruhi Babayan, The Guthrie Clinic; Terry Bauch, Geisinger Medical Center; Jennifer Berliner, V.A. Pittsburgh Healthcare System; Alfred Bove, Temple University Hospital; Donald Fox, Eastwick Primary Care PC; Ron Jacob, Lancaster Heart and Stroke Foundation; Carlos Jamis-Dow, Penn State Milton S Hershey Medical Center; Venkatesh Nadar, Capital Area Research LLC; Thomas Phiambolis, Lankenau Medical Center

## **South Carolina**

David Gregg, Medical University of South Carolina; David Isbell, Columbia Heart; Steven Johnson, Upstate Cardiology PA; Priya Kumar, Piedmont Cardiology Associates

## **Tennessee**

Shobha Hiremagalur, Blue Ridge Medical Management Corporation; David Huneycutt Jr, Centennial Heart Cardiovascular Consultants; Elie Korban, Kore Cardiovascular Research; Harry Severance, Erlanger Medical Center

## **Texas**

Subhash Banerjee, V.A. North Texas Health Care System; Gurpreet Baweja, Texas Health Research and Education Institute; John Erwin III, Scott and White Memorial Hospital; Osvaldo Gigliotti, Seton Medical Center; Muhammad Khan, North Dallas Research Associates; Ira Lieber, Texas Cardiology Associates of Houston; Frank Navetta, Tyler Cardiovascular Consultants PA; John Osborne, State of the Heart Cardiology; Ahmad Slim, Brooke Army Medical Center; Richard Wilks, BHS Specialty Network Inc.

## **Virginia**

Anu George, Seven Corners Medical Center; Aaron Hartman, Virginia Research Center LLC; Robert Levitt, National Clinical Research Inc.; Charles Phillips, Virginia Cardiovascular Specialists; Michael Salerno, University of Virginia Health System; Brian Schietinger, Centra Health Cardiovascular Group; Jack Slowikowski, Carilion Clinic Cardiac Research

## **Washington**

Vinay Malhotra, Cardiac Study Center; L. Douglas Waggoner, Kootenai Heart Clinics LLC

**West Virginia**

William Carter, Charleston Area Medical Center

**Wisconsin**

Joshua Liberman, Wisconsin Cardiovascular Group; Timothy Logemann, Aspirus Heart and Vascular Institute; John Manley, Wheaton Franciscan Healthcare/The Wisconsin Heart Hospital; Steve Port, Aurora Cardiovascular Services; Mary Zasadil, University of Wisconsin Madison

**CANADA****Ontario**

Benjamin Chow, University of Ottawa Heart Institute

**Quebec**

Eric Larose, Institute de Cardiologie et de Pneumologie de Quebec; Jean-Claude Tardif, Montreal Heart Institute

**Supplemental Table 1. Predictors of High-Risk CAD in the Final Derivation [50] Model (LM  $\geq$ 50% Stenosis *or* Either  $\geq$ 50% Stenosis 3VD or 2VD Involving the pLAD)**

|                                                                 | <b>Odds Ratio (95% CI)</b> | <b>P-value</b> |
|-----------------------------------------------------------------|----------------------------|----------------|
| Patient age (per 1-year increase)                               | 1.065 (1.049–1.081)        | <0.0001        |
| Male gender                                                     | 3.519 (2.679–4.622)        | <0.0001        |
| Diabetes mellitus                                               | 2.016 (1.546–2.628)        | <0.001         |
| Family history of premature (<55 years) CAD                     | 1.651 (1.274–2.140)        | 0.0001         |
| Typical/atypical/non-cardiac symptoms (typical vs. atypical)    | 1.332 (0.949–1.870)        | 0.0115         |
| Typical/atypical/non-cardiac symptoms (atypical vs non-cardiac) | 1.820 (1.089–3.039)        |                |
| Typical/atypical/non-cardiac symptoms (typical vs. non-cardiac) | 2.424 (1.354–4.341)        |                |
| GFR truncated at 95*                                            | 0.986 (0.977–0.995)        | 0.0017         |
| Systolic blood pressure (per 1-mmHg increase)                   | 1.013 (1.005–1.020)        | 0.0006         |
| Smoker                                                          | 1.575 (1.223–2.029)        | 0.0004         |

Model derivation c-statistic = 0.750 (0.723–0.777).

\*Effect of one unit increase up to 95. No additional effect for GFR>95.



**Supplemental Table 2. Final Derivation [50] Model Calibration of High-Risk Patients (LM  $\geq$ 50% Stenosis *or* Either  $\geq$ 50% Stenosis 3VD or 2VD Involving the pLAD)**

| <b>Decile</b> | <b>N</b> | <b>Observed Number of High-Risk Patients in Decile</b> | <b>Predicted Number of High-Risk Patients in Decile</b> | <b>Observed Proportion of High-Risk Patients in Decile</b> | <b>Mean Predicted Probability in Decile</b> |
|---------------|----------|--------------------------------------------------------|---------------------------------------------------------|------------------------------------------------------------|---------------------------------------------|
| 0             | 443      | 3                                                      | 4.68                                                    | 0.0068                                                     | 0.0106                                      |
| 1             | 444      | 2                                                      | 7.95                                                    | 0.0045                                                     | 0.0179                                      |
| 2             | 444      | 14                                                     | 10.98                                                   | 0.0315                                                     | 0.0247                                      |
| 3             | 444      | 15                                                     | 14.31                                                   | 0.0338                                                     | 0.0322                                      |
| 4             | 444      | 19                                                     | 18.15                                                   | 0.0428                                                     | 0.0409                                      |
| 5             | 444      | 26                                                     | 22.79                                                   | 0.0586                                                     | 0.0513                                      |
| 6             | 444      | 28                                                     | 28.85                                                   | 0.0631                                                     | 0.0650                                      |
| 7             | 444      | 41                                                     | 37.58                                                   | 0.0923                                                     | 0.0846                                      |
| 8             | 444      | 60                                                     | 52.38                                                   | 0.1351                                                     | 0.1180                                      |
| 9             | 444      | 85                                                     | 95.34                                                   | 0.1914                                                     | 0.2147                                      |

**Supplemental Table 3. Predictors of High-Risk CAD in the Final Derivation [70] Model (LM  $\geq$ 50% Stenosis *or* Either  $\geq$ 70% Stenosis 3VD or 2VD Involving the pLAD)**

|                                                                  | <b>Odds Ratio [95% CI]</b> | <b>P-value</b> |
|------------------------------------------------------------------|----------------------------|----------------|
| Patient age (per 1 year increase)                                | 1.065 (1.040–1.090)        | <0.0001        |
| Male gender                                                      | 4.907 (3.105–7.753)        | <0.0001        |
| Diabetes mellitus                                                | 1.605 (1.048–2.459)        | 0.0297         |
| Family history of premature (<55 years) CAD                      | 1.613 (1.072–2.428)        | 0.0219         |
| Typical/atypical/non-cardiac symptoms (typical vs. atypical)     | 2.342 (1.479–3.708)        | 0.0007         |
| Typical/atypical/non-cardiac symptoms (typical vs non-cardiac)   | 2.907 (1.292–6.540)        |                |
| Typical/atypical/non-cardiac symptoms (atypical vs. non-cardiac) | 1.242 (0.590–2.613)        |                |
| GFR (per 1 mL/min/1.73 m <sup>2</sup> )                          | 0.988 (0.977–1.000)        | 0.0476         |
| Systolic blood pressure (per 1-mmHg increase)                    | 1.013 (1.002–1.025)        | 0.0223         |
| Sedentary lifestyle                                              | 1.571 (1.061–2.327)        | 0.0242         |

Model derivation c-statistic = 0. 758 (0.709–0.807).

**Supplemental Table 4. Final Derivation [70] Model Calibration of High-Risk Patients (LM  $\geq$ 50% Stenosis *or* Either  $\geq$ 70% Stenosis 3VD or 2VD Involving the pLAD)**

| <b>Decile</b> | <b>N</b> | <b>Observed Number of Events in Decile</b> | <b>Predicted Number of Events in Decile</b> | <b>Observed Proportion of Events in Decile</b> | <b>Mean Predicted Probability of Event in Decile</b> |
|---------------|----------|--------------------------------------------|---------------------------------------------|------------------------------------------------|------------------------------------------------------|
| 0             | 444      | 3                                          | 1.35                                        | 0.0068                                         | 0.0030                                               |
| 1             | 444      | 5                                          | 2.27                                        | 0.0113                                         | 0.0051                                               |
| 2             | 445      | 3                                          | 3.29                                        | 0.0067                                         | 0.0074                                               |
| 3             | 444      | 2                                          | 4.49                                        | 0.0045                                         | 0.0101                                               |
| 4             | 444      | 5                                          | 5.96                                        | 0.0113                                         | 0.0134                                               |
| 5             | 445      | 7                                          | 7.70                                        | 0.0157                                         | 0.0173                                               |
| 6             | 444      | 7                                          | 9.91                                        | 0.0158                                         | 0.0223                                               |
| 7             | 445      | 15                                         | 13.45                                       | 0.0337                                         | 0.0302                                               |
| 8             | 444      | 17                                         | 19.92                                       | 0.0383                                         | 0.0449                                               |
| 9             | 444      | 46                                         | 41.66                                       | 0.1036                                         | 0.0938                                               |

**Supplemental Figure 1:** [50] and [70] model comparison with other risk scores. Both the **(a)** [50] model and **(b)** [70] model performed better than the ASCVD and modified DFS in predicting high-risk CAD. **(a)** [50] model versus ASCVD: chi-square=12.22, p=0.0005, [50] model versus modified DFS: chi-square=26.90, p<0.0001. **(b)** [70] model versus ASCVD: chi-square=6.19, p=0.0129, [70] model versus modified DFS: chi-square=9.47, p=0.0021. DF indicates Diamond-Forrester Risk Score; ASCVD indicates the atherosclerotic cardiovascular disease risk score (Pooled Cohort Equation).

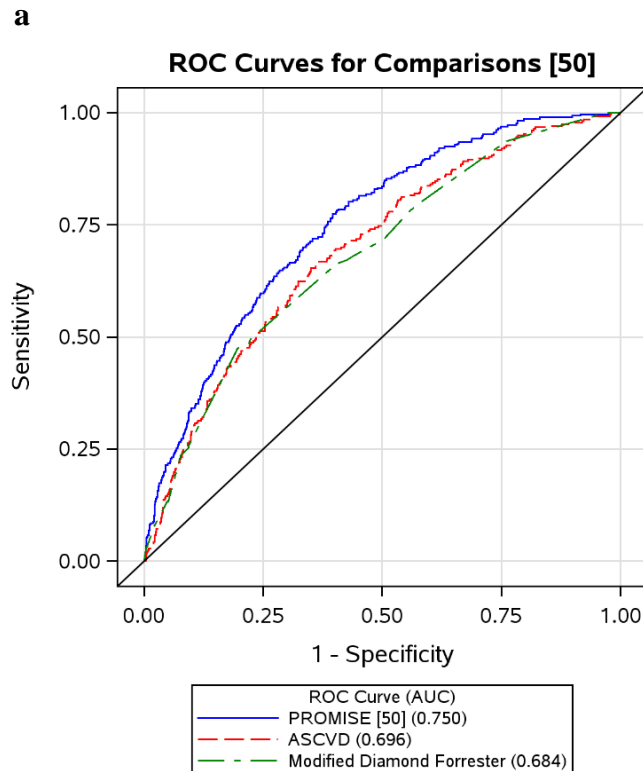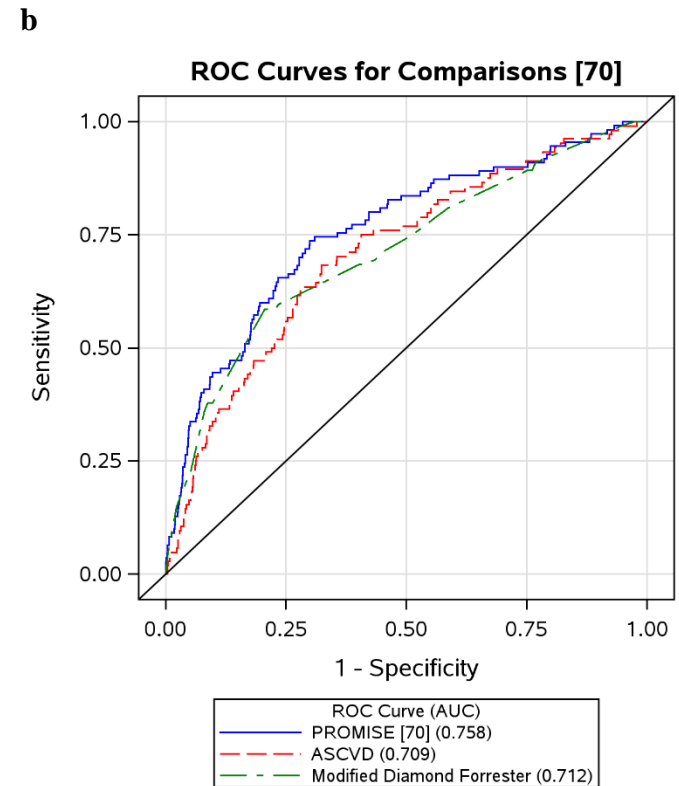

**Supplemental Figure 2:** Comparison of [70] model with the CONFIRM high-risk model. The [70] model performed similarly to the CONFIRM high risk model (chi-square=2.15, p=0.1422).

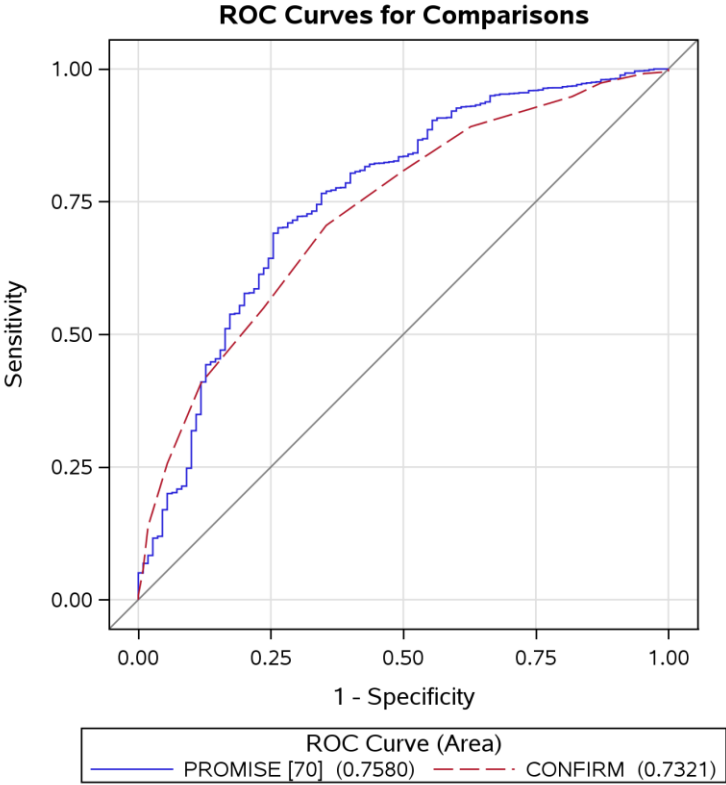

Supplement: NIHMS1518353-supplement-Legacy_Supplemental_File.pdf [file NIHMS1518353-supplement-Legacy_Supplemental_File.pdf]
